# Supplementary material for: Nanostructured morphology control and phase transition of zeolitic imidazolate frameworks as an ultra-high performance adsorbent for water purification
Source: Royal Society of Chemistry journal article supplement (doi:10.1039/c9qi00851a), 2019-01-01
Supplement: c9qi00851a1.pdf [file c9qi00851a1.pdf]

## Electronic Supplementary Information

### Experimental

#### *Chemical reagents*

Methanol (99%), zinc nitrate hexahydrate (ACS reagent,  $\geq 98\%$ ) were purchased from Sigma Aldrich. 2-methylimidazole (2-MIM) was obtained from Sinopharm Chemical Reagent Co., Ltd. Cupric nitrate and lead nitrate were purchased from Aladdin Chemical Co., Ltd. All chemicals were used as received without any further purification. Deionized water was used in all experiments.

#### *Fabrication of ZIF-8-x*

The general ZIF-8-0 was synthesized through an improved reported method <sup>1</sup>. First, 0.4 g  $\text{Zn}(\text{NO}_3)_2 \cdot 6\text{H}_2\text{O}$  was mixed with 9.6 mL water; after the solid was totally dissolved in the solvent, 0.5 g 2-MIM with 16 mL water was added into the solution. The mixture was stirred continuously for 30 min. The product was collected by centrifuging the mixture at 6000 rpm for 10 min. Afterwards, the product was washed several times with water and then dried in a vacuum oven. The different dosages of  $\text{Zn}(\text{NO}_3)_2$  and 2-MIM for various adsorbents (ZIF-8-z, z presents the mass ratio of zinc nitrate and 2-MIM) were summarized in **Table S1**. ZIF-8-x with different morphology were synthesized by using different contents of water (varying from 0% to 100%) in the aforementioned procedure. Schematic diagram of the experimental setup is depicted in **Fig. S1**.

#### *Characterization*

Field emission scanning electron microscope (SEM) image was taken by an S-

---

4800 (Hitachi, Japan). Powder X-ray diffraction (XRD) patterns were obtained by a powder diffractometer, Bruker D8 Advanced Diffractometer System, which was equipped with Cu K $\alpha$  radiation (40 kV, 40 mA). The adsorption value was measured with flame atomic absorption spectrometry (FAAS) (Z-2000, Hitachi). X-ray photoelectron spectroscopy (XPS) data were recorded using an Axis Ultra DLD X-ray photoelectron spectrometer equipped with an Al K $\alpha$  X-ray source (1486.6 eV). The Brunauer-Emmett-Teller (BET) surface area, pore volume and pore size were obtained by a Gemini VII2390 instrument. Thermal gravimetric analysis (TGA) measurements were performed on a NETZSCH STA 449 F3 Thermoanalyzer, and about 15 mg of each sample was used for TGA analysis.

#### ***Batch adsorption experiment***

To explore the adsorption efficiency of Cu(II) by a series of ZIF-8-x, a batch of adsorption experiment was employed, using cupric nitrate as the source of Cu(II) solutions. Sorption experiments were carried out in Cu(II) aqueous solution (8 mL) incubated with 50 mg/L adsorbents mixed by a rotary shaker.

To explore the influence of pH values on the Cu(II) adsorption of ZIF-8-0, the pH of initial Cu(II) solution (200 mg L<sup>-1</sup>) was adjusted by 0.1M HCl and 0.1M NaOH solutions in the range of 1.0-5.5. For kinetic studies, typical adsorption experiments were performed under various adsorption time intervals (0-1 h) with the given initial ion concentration in the range of 5-50 mg L<sup>-1</sup>. The isotherm study was conducted under different temperature from 298 K to 308 K, each isotherm curves were conducted with different initial Cu(II) concentrations ranging from 10 to 300 mg L<sup>-1</sup>.

---

The residual Cu(II) concentration in the solution was determined using FAAS.

The adsorption capacity is calculated as follows:

$$q_e = \frac{(C_0 - C_e)V}{m} \quad (1)$$

In eqn (1),  $q_e$  ( $\text{mg g}^{-1}$ ) and  $C_e$  ( $\text{mg L}^{-1}$ ) are the adsorption capacity and equilibrium concentration of Cu(II), respectively.  $V$  (L) and  $m$  (g) in the equation are the volume of Cu(II) solution and the mass of adsorbent, respectively. The removal performance for different ions including Pb(II), Cd(II), Ni(II) and Fe(III) were conducted under the same initial concentration ( $200 \text{ mg L}^{-1}$ ), incubated for 1 h to reach adsorption equilibrium.

## S1. Schematic diagram

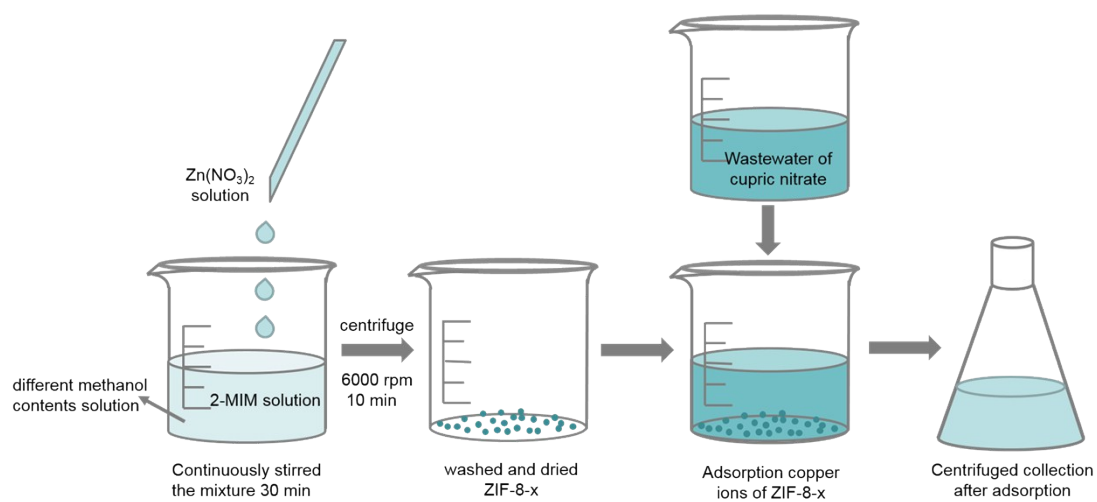

**Fig. S1** Schematic diagram of experimental process.

---

## S2. The characteristics and productivity of ZIF-8-z

**Table S1.** The dosages of  $\text{Zn}(\text{NO}_3)_2$  and 2-MIM for various ZIF-8-z adsorbents

| absorbent  | $\text{Zn}(\text{NO}_3)_2$ (g) | 2-MIM (g) |
|------------|--------------------------------|-----------|
| ZIF-8-1:5  | 0.1                            | 0.5       |
| ZIF-8-2:5  | 0.2                            | 0.5       |
| ZIF-8-3:5  | 0.3                            | 0.5       |
| ZIF-8-4:5  | 0.4                            | 0.5       |
| ZIF-8-7:5  | 0.7                            | 0.5       |
| ZIF-8-10:5 | 1                              | 0.5       |
| ZIF-8-50:5 | 5                              | 0.5       |

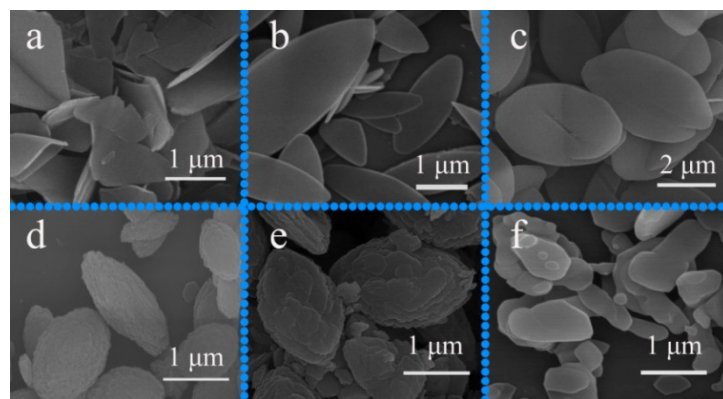

**Fig. S2** SEM of various ZIF-8-z, a) ZIF-8-1:5, b) ZIF-8-2:5, c) ZIF-8-4:5, d) ZIF-8-7:5, e) ZIF-8-10:5 and f) ZIF-8-50:5.

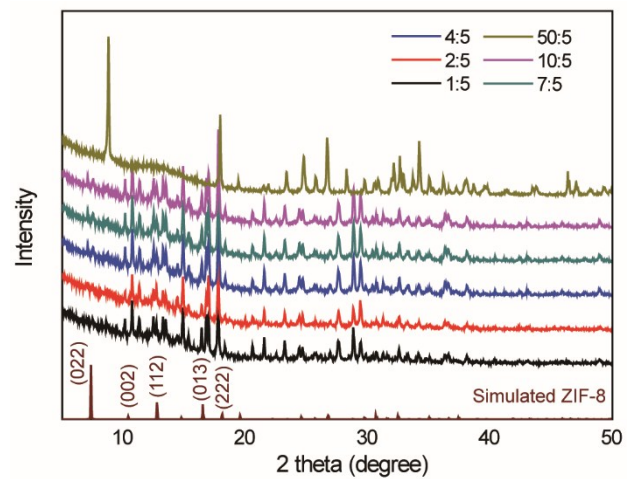

**Fig. S3** The XRD patterns of ZIF-8-1:5, ZIF-8-2:5, ZIF-8-4:5, ZIF-8-7:5, ZIF-8-10:5 and ZIF-8-50:5.

---

**Table S2.** The productivity for various ZIF-8-z adsorbents.

| absorbent        | Productivity (%) |
|------------------|------------------|
| ZIF-8-1:5        | 18.11            |
| ZIF-8-2:5        | 22.89            |
| ZIF-8-3:5        | 26.67            |
| <b>ZIF-8-4:5</b> | <b>29.78</b>     |
| ZIF-8-7:5        | 28.64            |
| ZIF-8-10:5       | 28.18            |
| ZIF-8-50:5       | 28.21            |



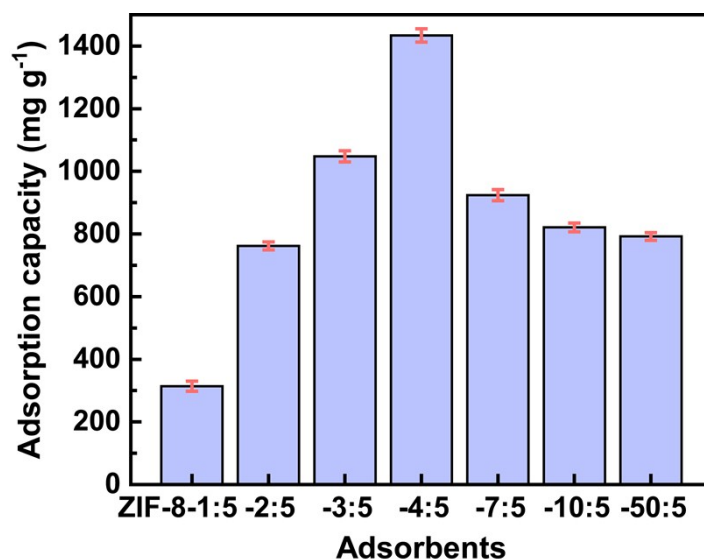

**Fig. S4** Adsorption capacities of different ZIF-8-z adsorbents towards Cu(II).

To investigate the effect of Zn(II) concentration on the synthesis of ZIF-8, 6 kinds of ZIF-8-z were prepared in pure water and then characterized. As shown in **Fig. S2**, the concentration of zinc nitrate hexahydrate is a crucial factor to control the morphology and structure of the obtained ZIF-8-z from irregular nanosheet, leaf-shape nanosheet and fusiform nanoparticle to irregular nanoparticle. Correspondingly, as shown in **Fig. S3**, the crystal structure changed from ZIF-8 phase to ZIF-L phase. When the mass ratio of zinc nitrate hexahydrate was lower than 50:5, it shows no significant effect on the crystallinity of the ZIF-8-z. Thereinto, the better productivity ZIF-8-4:5 (29.78%) than other ZIF-8-z were concluded from the productivity results in **Table S2**. Furthermore, because the ZIF-8-4:5 shows better adsorption capacity compared to the other adsorbents in the **Fig. S4**, we choose this mass ratio of zinc nitrate hexahydrate and 2-MIM to further investigate the solvent effect in morphology transformation.

**S3. The composition and SEM images of ZIF-8-x**

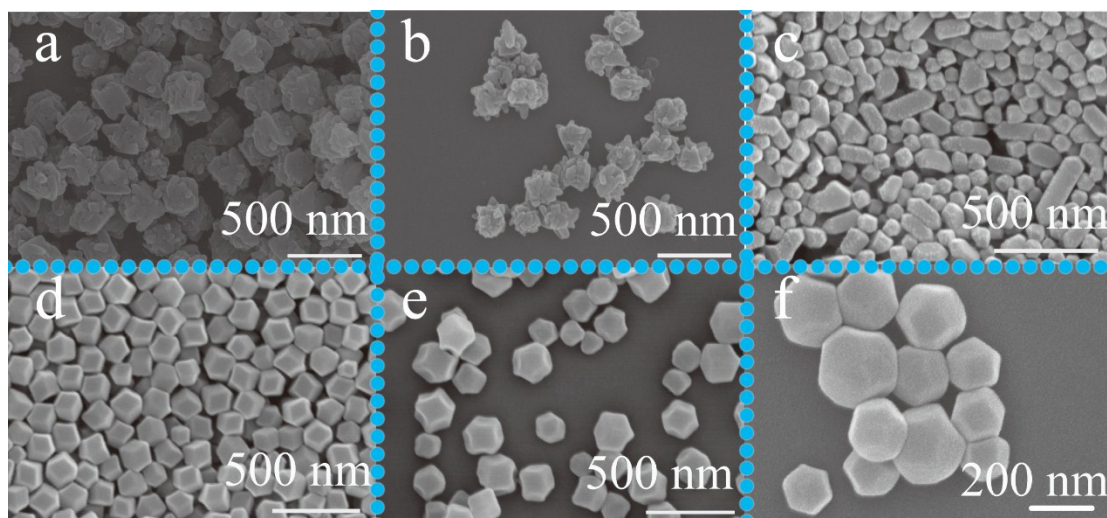

**Fig. S5** SEM images of a) ZIF-8-27.5, b) ZIF-8-30, c) ZIF-8-45, d) ZIF-8-55 e) ZIF-8-60 and f) ZIF-8-100.

---

**S4. SEM of ZIF-8-0 prepared under different reaction times**

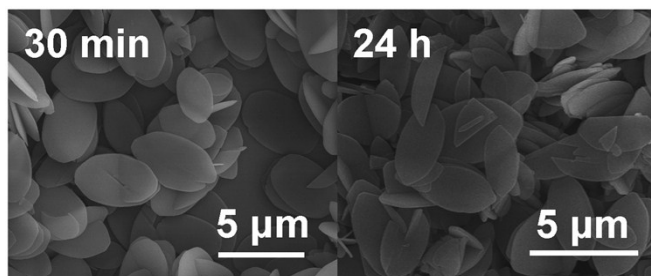

**Fig. S6** SEM characterization of ZIF-8-0 prepared under different reaction times.

---

### S5. Viscosity coefficients and dielectric constants of ZIF-8-x solution

**Table S3.** Viscosity coefficients and dielectric constants of methanol with different content of water.

---

| Solution   | Viscosity coefficients (293 K)/ mPas | Dielectric constants (293 K) |
|------------|--------------------------------------|------------------------------|
| 0% water   | 0.59                                 | 32.7                         |
| 10% water  | 0.66                                 | 36.9                         |
| 20% water  | 0.88                                 | 40.3                         |
| 30% water  | 1.02                                 | 43.1                         |
| 40% water  | 1.11                                 | 45.5                         |
| 50% water  | 1.17                                 | 49.9                         |
| 60% water  | 1.15                                 | 53.0                         |
| 70% water  | 1.07                                 | 58.5                         |
| 80% water  | 0.98                                 | 61.6                         |
| 90% water  | 0.92                                 | 69.7                         |
| Pure Water | 1.0                                  | 78.5                         |

---

---

**S6. The Full width at half maxima (FWHM) of ZIF-8-x**

**Table S4.** The Full width at half maxima (FWHM) of ZIF-8-x.

| Adsorbents | FWHM (degree) |
|------------|---------------|
| ZIF-8-0    | 0.154         |
| ZIF-8-20   | 0.120         |
| ZIF-8-40   | 0.230         |
| ZIF-8-50   | 0.186         |
| ZIF-8-60   | 0.141         |
| ZIF-8-80   | 0.105         |
| ZIF-8-100  | 0.124         |

---

### S7. Nitrogen sorption isotherms and corresponding parameters of ZIF-8-x

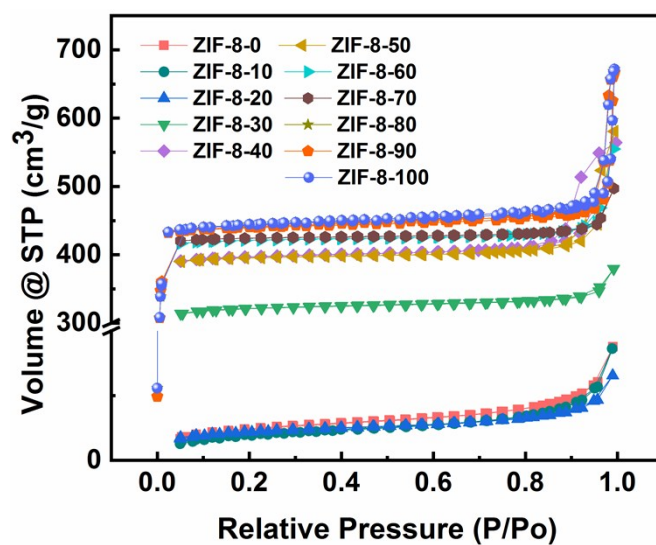

Fig. S7 Nitrogen sorption isotherms of ZIF-8-x nanocrystals.

---

**Table S5.** Pore volume of ZIF-8-x nanocrystals.

| Adsorbents | Pore volume (cm <sup>3</sup> /g) |
|------------|----------------------------------|
| ZIF-8-0    | 1.34×10 <sup>-2</sup>            |
| ZIF-8-10   | 1.26×10 <sup>-2</sup>            |
| ZIF-8-20   | 1.01×10 <sup>-2</sup>            |
| ZIF-8-30   | 0.58                             |
| ZIF-8-40   | 0.85                             |
| ZIF-8-50   | 0.87                             |
| ZIF-8-60   | 0.85                             |
| ZIF-8-70   | 0.76                             |
| ZIF-8-80   | 0.72                             |
| ZIF-8-90   | 0.65                             |
| ZIF-8-100  | 0.65                             |

---

---

**Table S6.** BET surface areas of ZIF-8-x nanocrystals.

| Adsorbents | BET surface areas (m <sup>2</sup> /g) |
|------------|---------------------------------------|
| ZIF-8-0    | 8.92                                  |
| ZIF-8-10   | 8.31                                  |
| ZIF-8-20   | 8.00                                  |
| ZIF-8-30   | 1.09×10 <sup>3</sup>                  |
| ZIF-8-40   | 1.35×10 <sup>3</sup>                  |
| ZIF-8-50   | 1.34×10 <sup>3</sup>                  |
| ZIF-8-60   | 1.43×10 <sup>3</sup>                  |
| ZIF-8-70   | 1.44×10 <sup>3</sup>                  |
| ZIF-8-80   | 1.67×10 <sup>3</sup>                  |
| ZIF-8-90   | 1.81×10 <sup>3</sup>                  |
| ZIF-8-100  | 1.82×10 <sup>3</sup>                  |

---



---

## S8. Batch adsorption experiments

**Table S7.** Adsorption capacities of different ZIF-8-x towards Cu(II).

| Adsorbents | Adsorption capacity (mg g <sup>-1</sup> ) |
|------------|-------------------------------------------|
| ZIF-8-0    | 1439                                      |
| ZIF-8-20   | 1364                                      |
| ZIF-8-40   | 1308                                      |
| ZIF-8-50   | 1174                                      |
| ZIF-8-60   | 1152                                      |
| ZIF-8-80   | 1121                                      |
| ZIF-8-100  | 954                                       |

---

SEM was employed to verify the water stability of the ZIF-8-0, which was conducted by immersing ZIF-8-0 in deionized water for 6 h and then dried it out for further characterization.

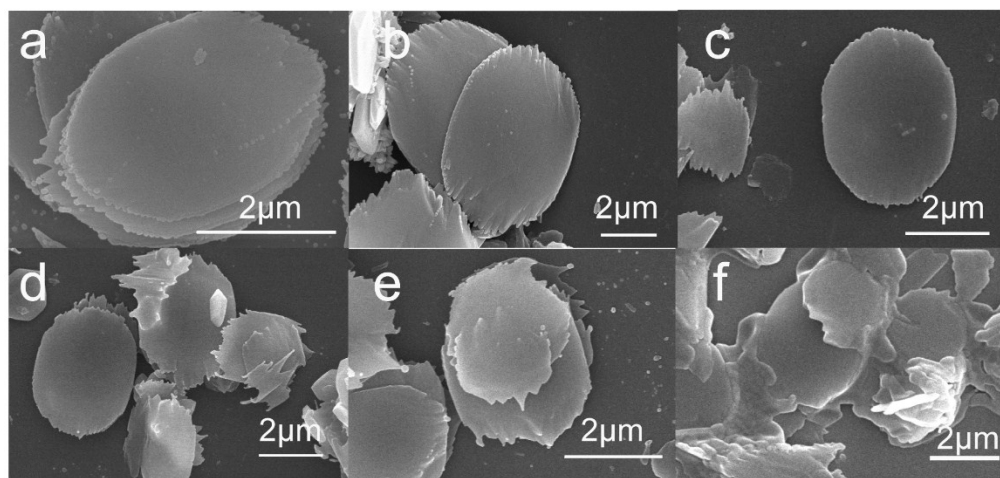

**Fig. S8** SEM images of ZIF-8-0 under different pH a) pH=5.5, b) pH=5, c) pH=4, d) pH=3 e) pH=2 and f) pH=1.

---

**Table S8** The pH change on Cu(II) adsorption by ZIF-8-0. Initial Cu(II)

concentration: 100 mg/L; adsorbent dosage: 50 mg/L.

| Initial pH value | Final pH value |
|------------------|----------------|
| 1.15             | 1.21           |
| 2.28             | 2.37           |
| 3.21             | 3.36           |
| 4.13             | 4.59           |
| 5.17             | 5.61           |
| 5.75             | 6.18           |

**Table S9.** Kinetic parameters of Cu(II) adsorption on ZIF-8-0.

| copper<br>concentrat<br>ion(mg L <sup>-1</sup> ) | pesudo-second-order |                     |                                      |       | pecudo-first-order            |                                |       |
|--------------------------------------------------|---------------------|---------------------|--------------------------------------|-------|-------------------------------|--------------------------------|-------|
|                                                  | $q_{e,exp}$         | $k_2$<br>(g/mg min) | $q_{e,cal}$<br>(mg g <sup>-1</sup> ) | $R^2$ | $k_1$<br>(min <sup>-1</sup> ) | $q_e$<br>(mg g <sup>-1</sup> ) | $R^2$ |
| 5                                                | 97.72               | 0.065               | 90.97                                | 0.963 | 0.87                          | 88.28                          | 0.948 |
| 10                                               | 212.28              | 1.486               | 203.23                               | 0.985 | 1.01                          | 201.13                         | 0.984 |
| 20                                               | 462.81              | 1.75                | 454.41                               | 0.994 | 1.10                          | 447.53                         | 0.985 |
| 30                                               | 627.15              | 0.0094              | 619.46                               | 0.991 | 1.11                          | 613.01                         | 0.984 |
| 50                                               | 810.44              | 1.69                | 801.13                               | 0.994 | 1.25                          | 787.17                         | 0.985 |

**Table S10.** Isotherm parameters of Cu(II)adsorption on ZIF-8-0.

| adsorbent | Temperature<br>(K) | Langmuir isotherm              |                                   |       | Freundlich isotherm            |      |       |
|-----------|--------------------|--------------------------------|-----------------------------------|-------|--------------------------------|------|-------|
|           |                    | $q_m$<br>(mg g <sup>-1</sup> ) | $K_L$<br>(L<br>mg <sup>-1</sup> ) | $R^2$ | $K_f$<br>(mg g <sup>-1</sup> ) | $n$  | $R^2$ |
| ZIF-8-0   | 308                | 1457.87                        | 0.057                             | 0.971 | 300.60                         | 3.39 | 0.969 |
|           | 303                | 1336.64                        | 0.034                             | 0.979 | 194.71                         | 2.89 | 0.974 |
|           | 298                | 1096.28                        | 0.029                             | 0.980 | 140.29                         | 2.74 | 0.976 |

---

**Table S11.** Thermodynamic parameters of Cu(II) adsorption on ZIF-8-0.

| adsorbent | Temperature (K) | $\Delta G^0$ (J mol <sup>-1</sup> ) | $\Delta H^0$ (KJ mol <sup>-1</sup> ) | $\Delta S^0$ (J mol <sup>-1</sup> K <sup>-1</sup> ) |
|-----------|-----------------|-------------------------------------|--------------------------------------|-----------------------------------------------------|
|           | 298             | -3419.94                            |                                      |                                                     |
| ZIF-8-0   | 303             | -4145.50                            | 576.06                               | 15.61                                               |
|           | 308             | -4646.69                            |                                      |                                                     |

---

---

**Table S12.** Cu(II) adsorption capacities and PC values of ZIF-8-0 under different temperatures.

| Temperature (K) | Final concentration (mg L <sup>-1</sup> ) | Adsorption capacity (mg g <sup>-1</sup> ) | Partition coefficient (mg g <sup>-1</sup> μM <sup>-1</sup> ) |
|-----------------|-------------------------------------------|-------------------------------------------|--------------------------------------------------------------|
| 298             | 0.61                                      | 187.82                                    | 308.41                                                       |
| 303             | 1.479                                     | 170.42                                    | 115.23                                                       |
| 308             | 2.979                                     | 140.42                                    | 47.14                                                        |

As shown in the **Table S12**, the maximum adsorption capacities and Partition coefficient of ZIF-8-0 towards Cu(II) rise obviously with the increase of temperature. We can conclude that the maximal partition coefficient is 308.41 mg g<sup>-1</sup> μM<sup>-1</sup>.

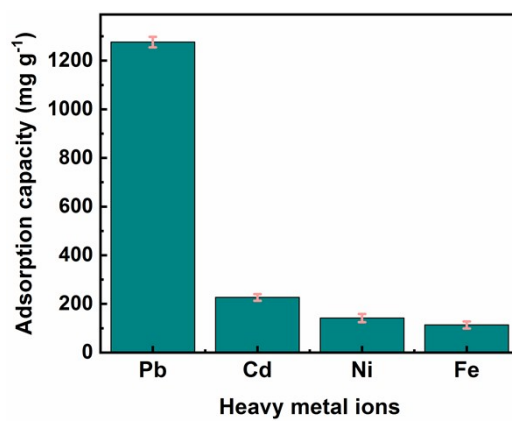

**Fig. S9** Adsorption capacity of ZIF-8-0 toward Pb<sup>2+</sup>, Cd<sup>2+</sup>, Ni<sup>2+</sup> and Fe<sup>3+</sup>.



**S9. XPS analysis of ZIF-8-0 before and after adsorption.**

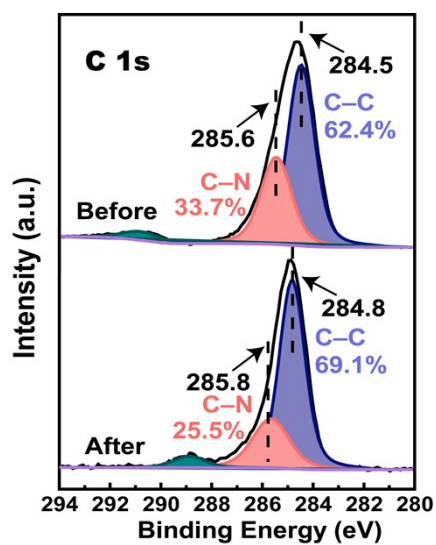

**Fig. S10** C 1s peaks of ZIF-8-0 before and after Cu<sup>2+</sup> adsorption.

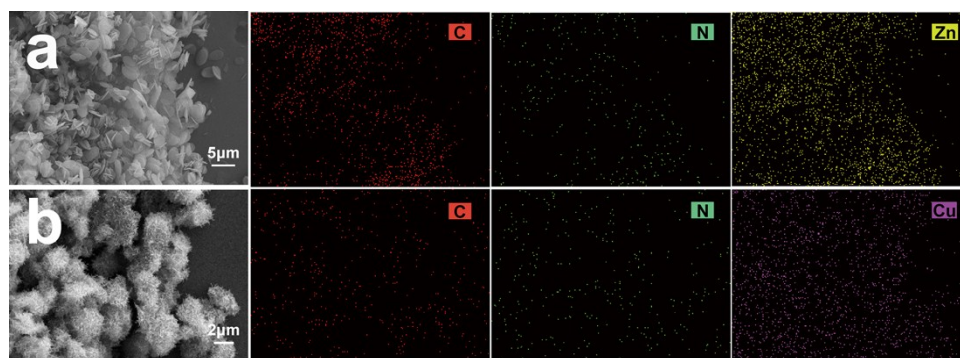

**Fig. S11** SEM-EDS mapping of ZIF-8-0 (a) before and (b) after Cu<sup>2+</sup> adsorption.

---

**Table S13.** SEM-EDS analysis of element content before and after adsorption.

| Element of ZIF-8-0 | Before adsorption | After adsorption |
|--------------------|-------------------|------------------|
| C                  | 36.57%            | 12.15%           |
| N                  | 22.71%            | 14.17%           |
| O                  | 5.14%             | 20.16%           |
| Zn                 | 35.58%            | 1.83%            |
| Cu                 | 0%                | 51.69%           |

---

---

## Reference

1. R. Chen, J. Yao, Q. Gu, S. Smeets, C. Baerlocher, H. Gu, D. Zhu, W. Morris, O. M. Yaghi and H. Wang, *Chem. Commun.*, 2013, **49**, 9500-9502.
